# Supplementary material
Source: PubMed Central journal article supplement (PMC2919923)
Supplement: 1007580107_pnas.1007580107_SI.pdf [file 1007580107_pnas.1007580107_SI.pdf]

# Supporting Information

Belotserkovskii et al. 10.1073/pnas.1007580107

## SI Text

**SI Methods. Estimation of the percentages of blockage.** The intensities of the bands were measured by phosphoimaging, as described in more details in ref. 1. In our calculations we assume that the transcriptional products are homogeneously labeled, and consequently the intensities of their signals are proportional to their lengths. Therefore, for linear DNA templates the molar percentage of the truncated blockage products are estimated from the following equation:

$$p_s = \frac{\frac{I_s L_{r-off}}{I_{r-off} L_s}}{\frac{I_s L_{r-off}}{I_{r-off} L_s} + 1}, \quad [S1]$$

where  $p_s$  is the percentage of the blockage,  $I_s$  and  $I_{r-off}$  are intensities, and  $L_s$  and  $L_{r-off}$  are lengths of specific blockage product and runoff product, respectively. For linear G32 the percentage of blockage estimated by Eq. S1 was  $12.6 \pm 1.1\%$ .

For supercoiled templates, the quantitative estimation for the percentage of blockage is complicated by the fact that, due to the absence of specific termination sites in our plasmids, the apparent “runoff” product is heterogeneous. To estimate the percentage of blockage inserts G20T4G8 and C20T4C8 were cloned into a ribozyme-containing vector (1–3). The ribozyme cleaves RNA with about 80% efficiency 0.56 kb downstream of the insert of interest, and the cleavage product can be used for normalization of the blockage signal:

$$p_s = \frac{\frac{\theta I_s L_{ribo}}{I_{ribo} L_s}}{\frac{\theta I_s L_{ribo}}{I_{ribo} L_s} + 1}, \quad [S2]$$

where  $p_s$  is the percentage of the blockage,  $I_s$  and  $I_{ribo}$  are intensities, and  $L_s$  and  $L_{ribo}$  are lengths of specific blockage product and ribozyme cleavage product, respectively, and  $\theta$  is the efficiency of ribozyme cleavage.

**Multiple-round transcription.** Transcription reactions were performed as described in 12  $\mu$ L of buffer containing 10 ng of DNA substrate, 33 mM TrisHCl (pH 7.9), 5 mM MgCl<sub>2</sub>, 8.3 mM NaCl, 1.7 mM spermidine, 4.2 mM DTT, 0.17 mM each ATP, GTP, and UTP, 0.017 mM CTP, about 10  $\mu$ Ci ( $\alpha$ -<sup>32</sup>P) CTP, 20 units of T7 RNA polymerase, and 16 units of RNasin (both from Promega Corp.) for 30 min at 37 °C. When GTP in the transcription reaction was substituted by ITP (Sigma-Aldrich) or 7-deazaGTP (TriLink BioTechnologies), 0.67 mM GMP (Sigma-Aldrich) was added to the reaction (4). The reaction was stopped by adding 94  $\mu$ L of stop buffer containing 1% SDS, 106 mM TrisHCl (pH 7.6), 160 mM NaCl, 13.2 mM EDTA, 25  $\mu$ g tRNA, and 10  $\mu$ g Proteinase K, and after 15 min incubation at the room temperature, transcription products were ethanol-precipitated and analyzed on the sequencing gel as described in ref. 1.

## Single-round transcription.

For the single-round transcription experiment, for two of our plasmids, G20T4G8 and C20T4C8, a 37-bp-long T-less sequence GGGAGACCACAACGGGACAGACCAGACCGCACAGA GC was placed immediately downstream from the T7 promoter. Except for the last three nucleotides, this sequence is identical to the 34-bp-long sequence used by Zhou and Martin (5). First, to initiate transcription and obtain stalled elongation complex 37 nt downstream from the promoter, 10 ng of template DNA were

incubated with T7 RNAP in 10  $\mu$ L of U-less mixture containing 0.2 mM ATP, and GTP, 0.02 mM CTP, 10  $\mu$ Ci ( $\alpha$ -<sup>32</sup>P) CTP, 20 units of T7 RNA polymerase, and 16 units of RNasin for 5 min at 37 °C. The buffer conditions were 20 mM TrisHCl (pH 7.9), 15 mM MgCl<sub>2</sub>, 1 mM DTT, 0.1 mM EDTA, and 0.05% Tween20 (6, 7). To continue elongation, 2  $\mu$ L of mixture containing 1 mM UTP (which allows further elongation) and 1.5 mg/mL heparin (which prevents new transcription initiation but allows elongation of already existing stalled transcription complexes) was added (producing the final concentration of heparin 250  $\mu$ g/mL, and the final concentration of UTP 0.17 mM), and the incubation was continued at 37 °C for the designed time. Stopping transcription reaction and purification and analysis of the transcription products were the same as for the multiple-round transcription (see the main text).

## Transcription-dependent oligonucleotide hybridization.

5'-Oligonucleotide labeling was performed with <sup>32</sup>P- $\gamma$ -ATP (PerkinElmer) using T4 polynucleotide kinase (Invitrogen), followed by purification with a nucleotide removal kit (Qiagen). Transcription was performed in 12  $\mu$ L of buffer containing 200 ng of DNA substrate, 33 mM TrisHCl (pH 7.9), 5 mM MgCl<sub>2</sub>, 8.3 mM NaCl, 1.7 mM spermidine, 4.2 mM DTT, 0.17 mM of each NTP, and 20 units of T7 RNA polymerase for 20 min at 37 °C. Then 1.2  $\mu$ L of 100 mM EDTA and 1.2  $\mu$ L of RNaseA/T mixture (Ambion) were added and the mixture was incubated 1 h at 37 °C. Then 1.2  $\mu$ L of 1.25 M NaCl and 1.5  $\mu$ L radioactively labeled oligonucleotide (approximate concentration 300 nM) were added to the mixture, and the incubation continued for 1 h at room temperature. For experiments involving RNaseH, transcription and RNaseA and T treatment were performed as described above, except the reactions were upscaled 5-fold. Next, the products were purified using a PCR purification kit (Qiagen) and recovered in 30  $\mu$ L elution buffer (Qiagen). Next, to 7.5  $\mu$ L of this solution, 1.2  $\mu$ L of 10 $\times$  RNaseH buffer (NEB), 2.3  $\mu$ L H<sub>2</sub>O, and 1  $\mu$ L of RNaseH (5 units/ $\mu$ L, NEB) were added and the mixture was incubated at 37 °C for 1 h. Next, 1.2  $\mu$ L of 100 mM EDTA, 1.2  $\mu$ L H<sub>2</sub>O, 1.2  $\mu$ L of 1.25 M NaCl, and 1.5  $\mu$ L radioactively labeled oligonucleotide were added and incubation was performed for 1 h at room temperature. The samples were placed in a precooled (–20 °C) rack. For analysis, the samples were loaded on 1% agarose gels and electrophoresis was performed overnight at about 1 V/cm at 4 °C. The gel was stained with EtBr, photographed, placed on a Hybond membrane, dried, and exposed (without separation from the membrane) to a phosphorimager screen.

**SI Discussion. Possible sterical constraints for further transcription elongation produced by R-loop formation.** During transcription the nascent RNA is separated from the DNA template upon exiting the transcription complex. However, in some cases, for example when an exceptionally stable rPu/dPy duplex is formed, the RNA-DNA hybrid persists behind the transcription complex forming an R loop. According to suggested models, the R-loop is formed by RNA rehybridization with the template DNA strand in the unwound region of DNA duplex immediately upstream of the transcription bubble (8, 9).

Here we will analyze what happens when RNAP has just formed a stable R loop during transcription of a template sequence that is prone to R-loop formation, and now begins to transcribe an “ordinary” DNA sequence.

One option is that RNAP will exit the “R-loop synthesis mode” and continue transcription in a “normal” way, i.e., with separation







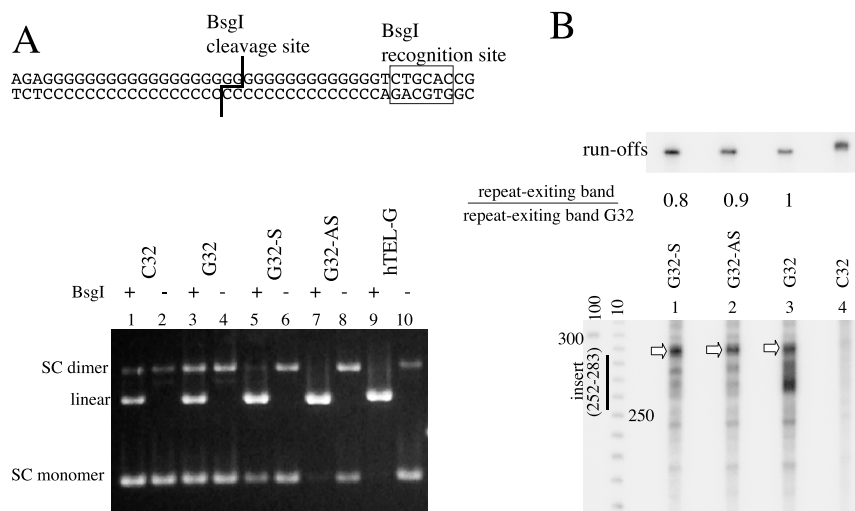

**Fig. 55.** Transcription blockage does not correlate with triplex-forming potential. (A) Protection from BsgI cleavage is consistent with expected triplex-forming potential. BsgI is a restriction enzyme that cleaves arbitrary sequences in double-stranded DNA that are localized at a fixed distance from its specific recognition site (see the scheme at the top with G32 sequence as an example). In this case, it cleaves the G32 insert or its derivatives, converting supercoiled plasmid into the linear form. If the cleavage site occurs within an unusual DNA structure (for example, a triplex), this would inhibit the cleavage, and this inhibition will increase with increased formation of the structure. It can be seen that the protection (i.e., the ratio of remaining supercoiled to linear DNA) is much stronger for G32-S than for G32-AS plasmid (in the latter, the cleavage is practically complete). Protection in G32 and C32 is stronger than in G32-S, most likely because PyPuPu triplexes formed in mixed G,A sequences are less stable than triplexes formed by pure G sequences. The insert hTEL-G contains the sequence (TTAGGG)<sub>17</sub>, which under these conditions does not form any unusual structure, and, as expected, does not provide any protection. (B) Symmetric and asymmetric G-to-A substitutions in the G32 sequence have the same effect on blockage. White block arrows show exit bands, and the numbers above the lanes show the ratio of intensities for repeat-exiting bands of G32-S and G32-AS to the repeat-exiting band of G32. All repeat-exiting band intensities are normalized to the intensities of corresponding runoff bands. These results were for linear DNA templates.

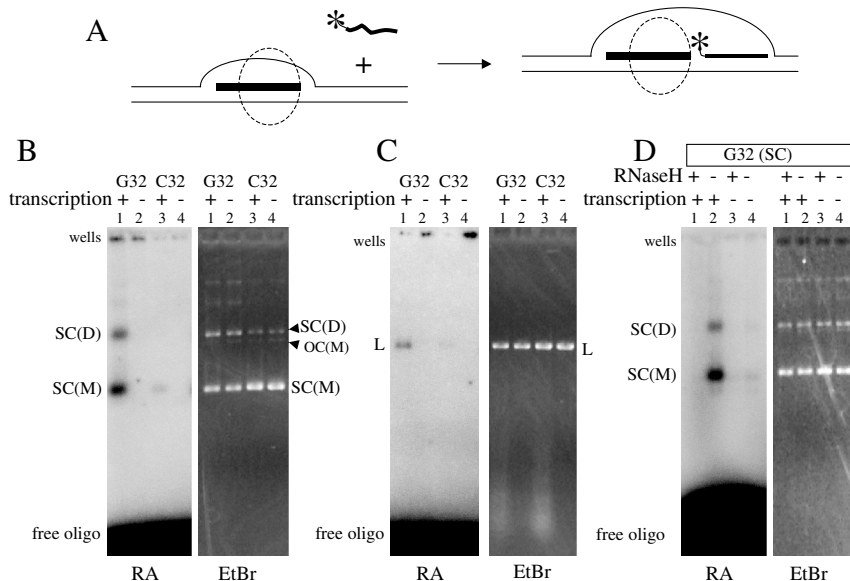

**Fig. 56.** Transcription-dependent oligonucleotide hybridization is much stronger for the sequence for which the blockage is observed. (A) Scheme of the hybridization experiment. Plasmid DNA is shown in thin lines, RNA is shown as a thick line, the radioactively labeled DNA oligonucleotide TCTGCACCGTGTC-GAGAGAT, which is complementary to the template strand immediately downstream of all the inserts used in this study, is shown as a line with asterisk, which symbolize a radioactive labeling. Before the oligonucleotide hybridization the transcription reaction was stopped by EDTA and treated by RNaseA/T mixture, which digests RNA not base-paired with DNA (see *SI Methods*). T7 RNAP (shown as a dashed-line circle) could either remain bound to RNA-DNA hybrid, or dissociate. (B) Hybridization with supercoiled DNA. (C) Hybridization with linear DNA. (D) RNaseH treatment prior to addition of the oligonucleotide abolishes the oligonucleotide hybridization. SC, OC, and L designate negatively supercoiled, open circular (nicked), and linear plasmids, and M and D designate monomer and dimer, respectively. "RA" stands for radioautograph; EtBr stands for ethidium bromide staining.



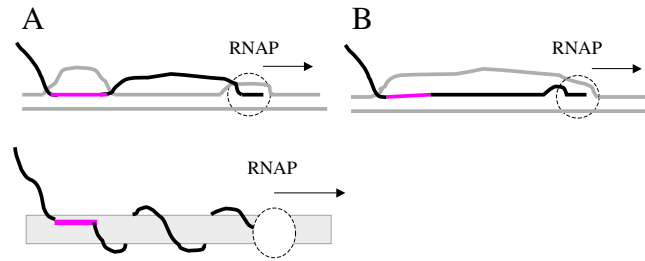

**Fig. S7.** Possible pathway of transcription elongation after stable R-loop formation. RNAP is shown as a dashed-lined circle, DNA is shown in gray, the RNA region that forms stable R loop is shown in magenta; the rest of the RNA is shown in black. (A) RNAP exits the "R-loop mode" and continues transcription in a normal way (i.e., with separation of the RNA/DNA hybrid). In this case, because the position of the R loop is fixed relative to the DNA duplex, and the RNAP rotates relative to DNA during transcription, this pathway will lead to wrapping of the nascent transcript around the DNA. (B) RNAP continues R-loop synthesis into ordinary downstream DNA sequences.

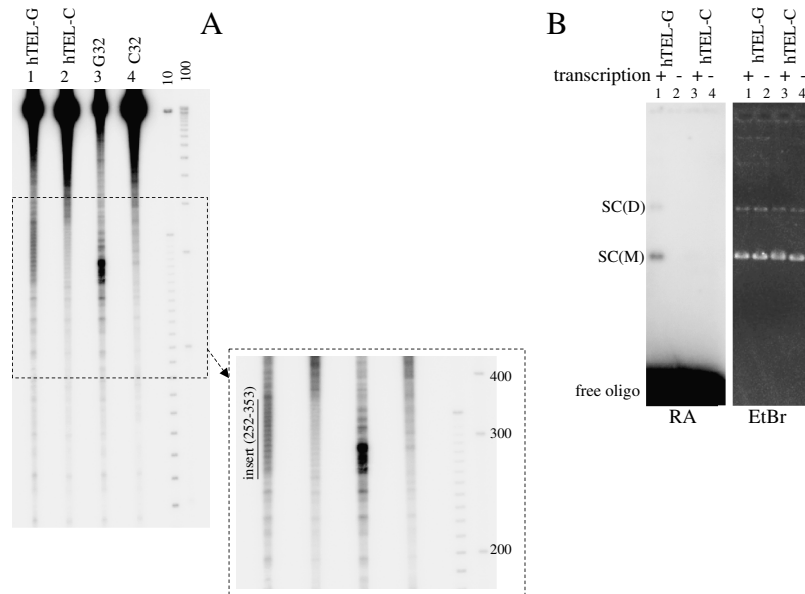

**Fig. S8.** Orientation-dependent partial transcription blockage and enhanced oligonucleotide hybridization for the human telomeric sequence. Inserts hTEL-G and hTEL-C contain the sequences  $(TTAGGG)_{17}$  and  $(CCCTAA)_{17}$ , respectively. (A) Transcription of supercoiled DNA templates. There is an increased density of truncated transcription products within the hTEL-G, but not the hTEL-C insert (compare lanes 1 and 2), which could be interpreted as an increased probability of blockage within the insert. This effect was much less pronounced than for the G32 versus C32 insert (lanes 3 and 4), and we were able to detect it only in supercoiled DNA. (B) Transcription-dependent oligonucleotide hybridization. Experiments and designations are similar to those in Fig. S6, except the complementary oligonucleotide (i.e., the one that binds to the non-template instead of the template strand immediately downstream of the insert) was used.
